# Supplementary material for: Identification of Niclosamide as a Novel Anticancer Agent for Adrenocortical Carcinoma
Source: Oxford University Press journal article supplement (doi:10.1158/1078-0432.ccr-15-2256), 2016-02-13
Supplement: 10780432ccr152256-sup-155687_1_supp_3295051_x0g3ly.doc [file 10780432ccr152256-sup-155687_1_supp_3295051_x0g3ly.doc]

**Supplemental Table 1**. Compounds pan-active in adrenocortical carcinoma cell lines NCI-H295R, BD140A and SW-13.

| **Compound Name** |
| --- |
| 4-Chloromercuriphenol |
| Aclarubicin hydrochloride |
| Actinomycin D;Dactinomycin;NSC-3053 |
| alpha-Tomatine |
| Auranofin |
| Carminomycin |
| Chromomycin A3 |
| Deslanoside |
| Digitoxin |
| Digoxin |
| Emetine |
| Idarubicin hydrochloride |
| Lanatoside A |
| Lanatoside C |
| Niclosamide |
| o-(Chloromercuri)phenol |
| Omacetaxine mepesuccinate |
| Ouabain |
| Plicamycin |
| Trabectedin |
| Zinc pyrithione |
